# Supplementary material for: Allele-specific enhancers mediate associations between LCAT and ABCA1 polymorphisms and HDL metabolism
Source: PubMed Central journal article supplement (PMC6490890; doi:10.1371/journal.pone.0215911), 2019-04-30
Supplement: pone.0215911.s003.pdf [file pone.0215911.s003.pdf]

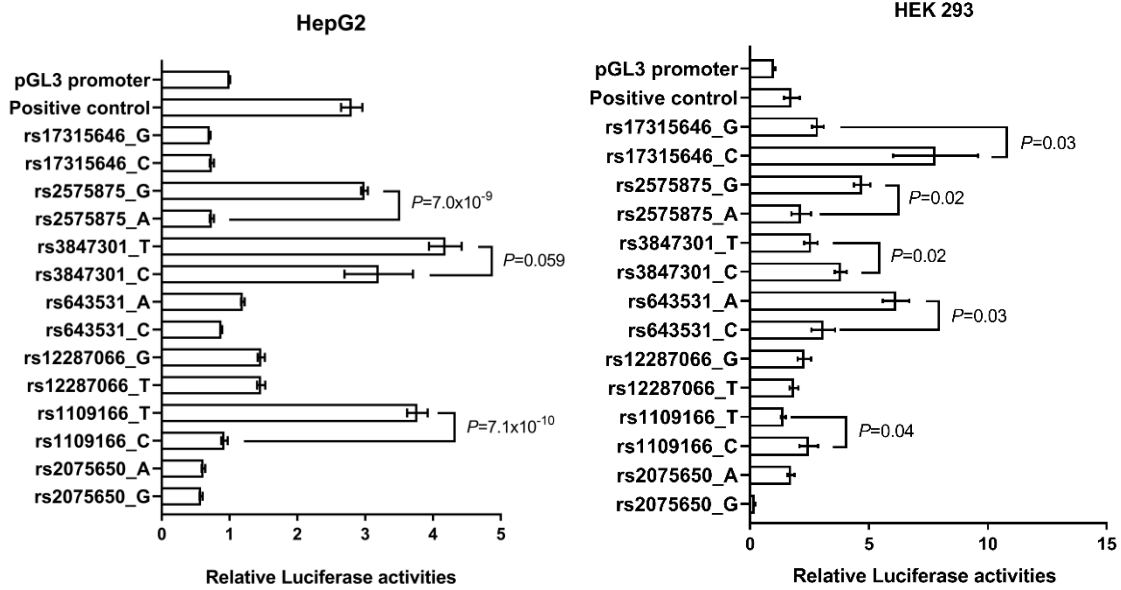

**S3 Fig. Cell type-specific *in vitro* enhancer activity in HepG2 and HEK 293 cells.**
