# Supplementary material for: Allele-specific enhancers mediate associations between LCAT and ABCA1 polymorphisms and HDL metabolism
Source: PubMed Central journal article supplement (PMC6490890; doi:10.1371/journal.pone.0215911), 2019-04-30
Supplement: pone.0215911.s004.pdf [file pone.0215911.s004.pdf]

**A**

|             | TF    | JASPAR |        |
|-------------|-------|--------|--------|
|             |       | Score  | Strand |
| rs2575875_G | STAT1 | 4.377  | +      |
|             | STAT3 | 3.326  | +      |
| rs2575875_A | STAT1 | 4.313  | -      |
|             | STAT1 | 10.12  | +      |
|             | STAT3 | 5.451  | -      |
|             | STAT3 | 12.481 | +      |

**B**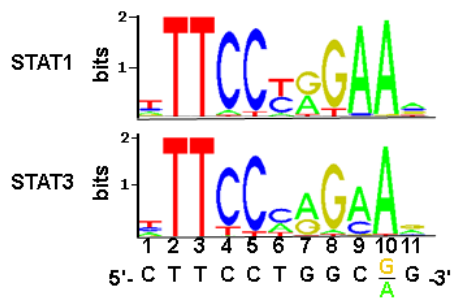**C**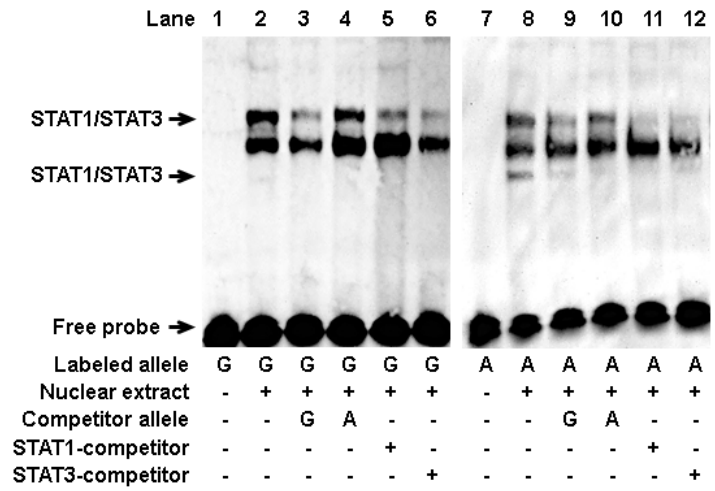

S4 Fig. STAT1 and STAT3 binding to rs2575875 alleles *in vitro*.
