# Supplementary material for: Allele-specific enhancers mediate associations between LCAT and ABCA1 polymorphisms and HDL metabolism
Source: PubMed Central journal article supplement (PMC6490890; doi:10.1371/journal.pone.0215911), 2019-04-30
Supplement: pone.0215911.s005.pdf [file pone.0215911.s005.pdf]

**A**

|             |       | JASPAR |        |
|-------------|-------|--------|--------|
|             | TF    | Score  | Strand |
| rs3847301_T | HNF4A | 5.31   | -      |
| rs3847301_C | HNF4A | 2.959  | -      |

**B**

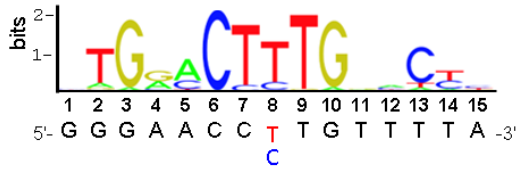

**C**

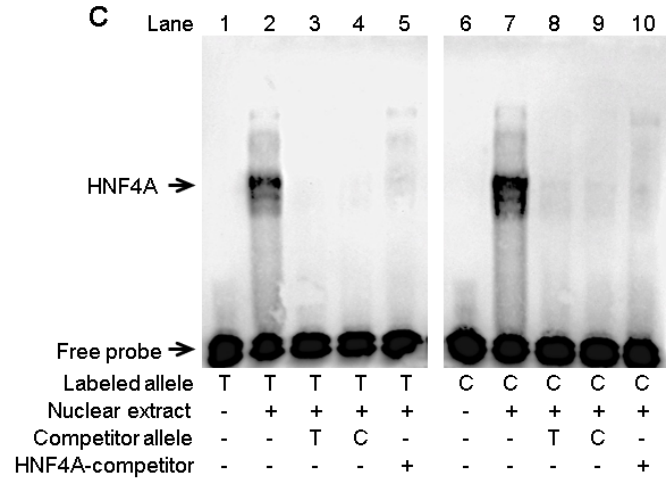

**S5 Fig. HNF4A binding to rs3847301 alleles *in vitro*.**
