# Supplementary material for: Allele-specific enhancers mediate associations between LCAT and ABCA1 polymorphisms and HDL metabolism
Source: PubMed Central journal article supplement (PMC6490890; doi:10.1371/journal.pone.0215911), 2019-04-30
Supplement: pone.0215911.s006.pdf [file pone.0215911.s006.pdf]

**A**

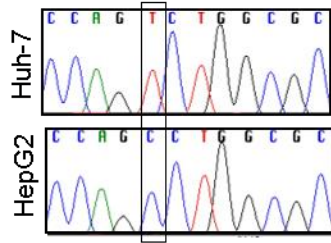

**B**

|             | JASPAR |         |        |
|-------------|--------|---------|--------|
|             | TF     | Score   | Strand |
| rs1109166_C | STAT3  | -12.662 | +      |
|             | STAT3  | -16.244 | -      |
| rs1109166_T | STAT3  | -14.168 | -      |

**S6 Fig. Huh-7 and HepG2 genotypes for rs1109166.**
